# Supplementary material
Source: PubMed Central journal article supplement (PMC6755808)

**Supplementary Figure Legends**

**Figure S1:** A) Representative images from Matrigel invasion assay experiments, indicated PDAC cell lines were stimulated with  $\alpha_2M^*$  (100 pM) for 30 min in the absence or presence of Scr peptide (100 pM), GRP78 peptide (100 pM), or C38 Mab (50  $\mu$ g) for 6h or Fasudil (5  $\mu$ M) for 16h to analyze Matrigel invasion assay. Serum within the lower wells served as the chemoattractant. Scale bar 20  $\mu$ m B) Rho activation assay was performed in PDAC cell lines and then stimulated with  $\alpha_2M^*$  (100 pM) for 30 min in the absence or presence of Akti (5  $\mu$ M) for 16h. C) Immunoprecipitation analysis of AKT and DLC1 in the indicated cancer cell lines stimulated with  $\alpha_2M^*$  (100 pM) for 30 min in the absence or presence of Scr peptide (100 pM), GRP78 peptide (100 pM), C38 Mab (50  $\mu$ g) for 6h or AKTi (5  $\mu$ M) for 16h. D) PDAC cells showing relative degree of RhoA protein suppression in siRNA mediated silencing of RhoA by immunoblot.

**Figure S2:** A,B) Representative images from Matrigel invasion assay experiments, indicated RhoA-silenced PDAC cell lines were stimulated with  $\alpha_2M^*$  (100 pM) for 30 min in the absence or presence of Scr peptide (100 pM), GRP78 peptide (100 pM), or C38 Mab (50  $\mu$ g) for 6h or Fasudil (5  $\mu$ M) for 16h to analyze Matrigel invasion assay. Serum within the lower wells served as the chemoattractant. Scale bar 20  $\mu$ m C, D) RhoA-silenced PDAC cell lines were stimulated with  $\alpha_2M^*$  (100 pM) for 30 min in the absence or presence of Scr peptide (100 pM), GRP78 peptide (100 pM), or C38 Mab (50  $\mu$ g) for 6h or Fasudil (5  $\mu$ M) for 16h to analyze migration and invasion by EZcell<sup>TM</sup> cell migration and Matrigel invasion<sup>TM</sup> assay. mean  $\pm$  SD of triplicates is shown.

**Figure S3:** A) quantitative RT-PCR analysis of YAP and TAZ genes in the PDAC cell lines stimulated with  $\alpha_2M^*$  (100 pM) for 30 min in the absence or presence of Scr peptide (100 pM), GRP78 peptide (100 pM), or C38 Mab (50  $\mu$ g) for 6h or Fasudil (5  $\mu$ M) for 16h. B) PDAC cells showing relative degree of YAP and TAZ suppression in siRNA-mediated silencing of YAP/TAZ. C) RhoA-silenced PDAC cell lines stimulated with  $\alpha_2M^*$  (100 pM) for 30 min in the absence or presence of Scr peptide (100 pM), or GRP78 peptide (100 pM), for 6h or Fasudil (5  $\mu$ M) for 16h and probed for indicated proteins. D,E) quantitative RT-PCR analysis of YAP and TAZ genes in the RhoA-silenced PDAC cell lines stimulated with  $\alpha_2M^*$  (100 pM) for 30 min in the absence or presence of Scr peptide (100 pM), GRP78 peptide (100 pM), or C38 Mab (50  $\mu$ g) for 6h or Fasudil (5  $\mu$ M) for 16h.

**Figure S4:** A) PDAC cells showing relative degree of YAP/TAZ suppression in siRNA-mediated silencing of YAP/TAZ by immunoblot. B) quantitative RT-PCR analysis of YAP and TAZ genes in the YAP/TAZ silenced PDAC cell lines stimulated with  $\alpha_2M^*$  (100 pM) for 30 min in the absence or presence of Scr peptide (100 pM), GRP78 peptide (100 pM), C38 Mab (50  $\mu$ g) for 6h or Fasudil (5  $\mu$ M) for 16h. C) Representative images from Matrigel invasion assay experiments. Indicated YAP/TAZ silenced PDAC cell lines were stimulated with  $\alpha_2M^*$  (100 pM) for 30 min in the absence or presence of Scr peptide (100 pM), GRP78 peptide (100 pM), or C38 Mab (50  $\mu$ g) for 6h or Fasudil (5  $\mu$ M) for 16h to analyze Matrigel invasion assay. Serum within the lower wells served as the chemoattractant. Scale bar 20  $\mu$ m D) quantitative RT-PCR analysis was performed in YAP/TAZ silenced PDAC cell lines stimulated with  $\alpha_2M^*$  (100 pM) for 30 min in the absence or presence of Scr peptide (100 pM), GRP78 peptide (100 pM), C38 Mab (50  $\mu$ g) for 6h or Fasudil (5  $\mu$ M) for 16h to quantify the transcript levels of the YAP/TAZ target genes Ctgf, Cyr61 and Axl.

**Figure S5:** A) Representative images from Matrigel invasion assay experiments. Indicated PDAC cell lines receiving 0 or 3 Gy and then treated with Scr peptide (100 pM), GRP78 peptide (100 pM), or C38 Mab (50  $\mu$ g) for 6h to analyze Matrigel invasion assay. Serum within the lower wells served as the chemoattractant. Scale bar 20  $\mu$ m B) Immunoblot analysis of the PDAC cell lines after receiving 0 or 3 Gy and then treated with Scr peptide (100 pM), GRP78 peptide (100 pM), or C38 Mab (50  $\mu$ g) for 6h prior to probing for indicated proteins. C) Immunoprecipitation analysis of P-AKT Ser<sup>473</sup> and DLC1 in the PDAC cell lines receiving 0 or 3 Gy and then treated with Scr peptide (100 pM), GRP78 peptide (100 pM), or C38 Mab (50  $\mu$ g) for 6h prior to probing for indicated proteins. D) Indicated PDAC cell lines receiving 0 or 3 Gy and then treated with AKTi (5  $\mu$ M) or Fasudil (5  $\mu$ M) for 16h to analyze migration and invasion by EZcell<sup>TM</sup> cell migration and Matrigel invasion assay. mean  $\pm$  SD of triplicates is shown. E) Representative images from Matrigel invasion assay experiments as mentioned in D. Scale bar 20  $\mu$ m \*,  $p$  values  $\leq$  0.05.

Supplemental Fig 1

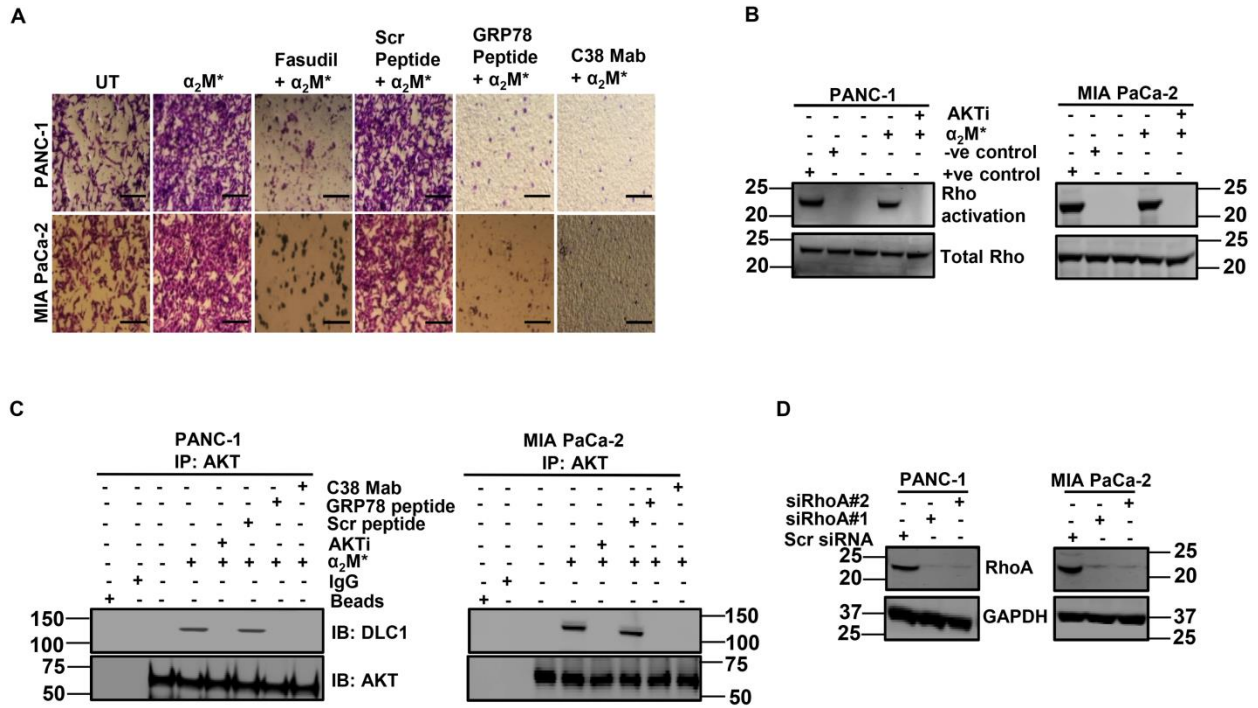

Supplemental Fig 2

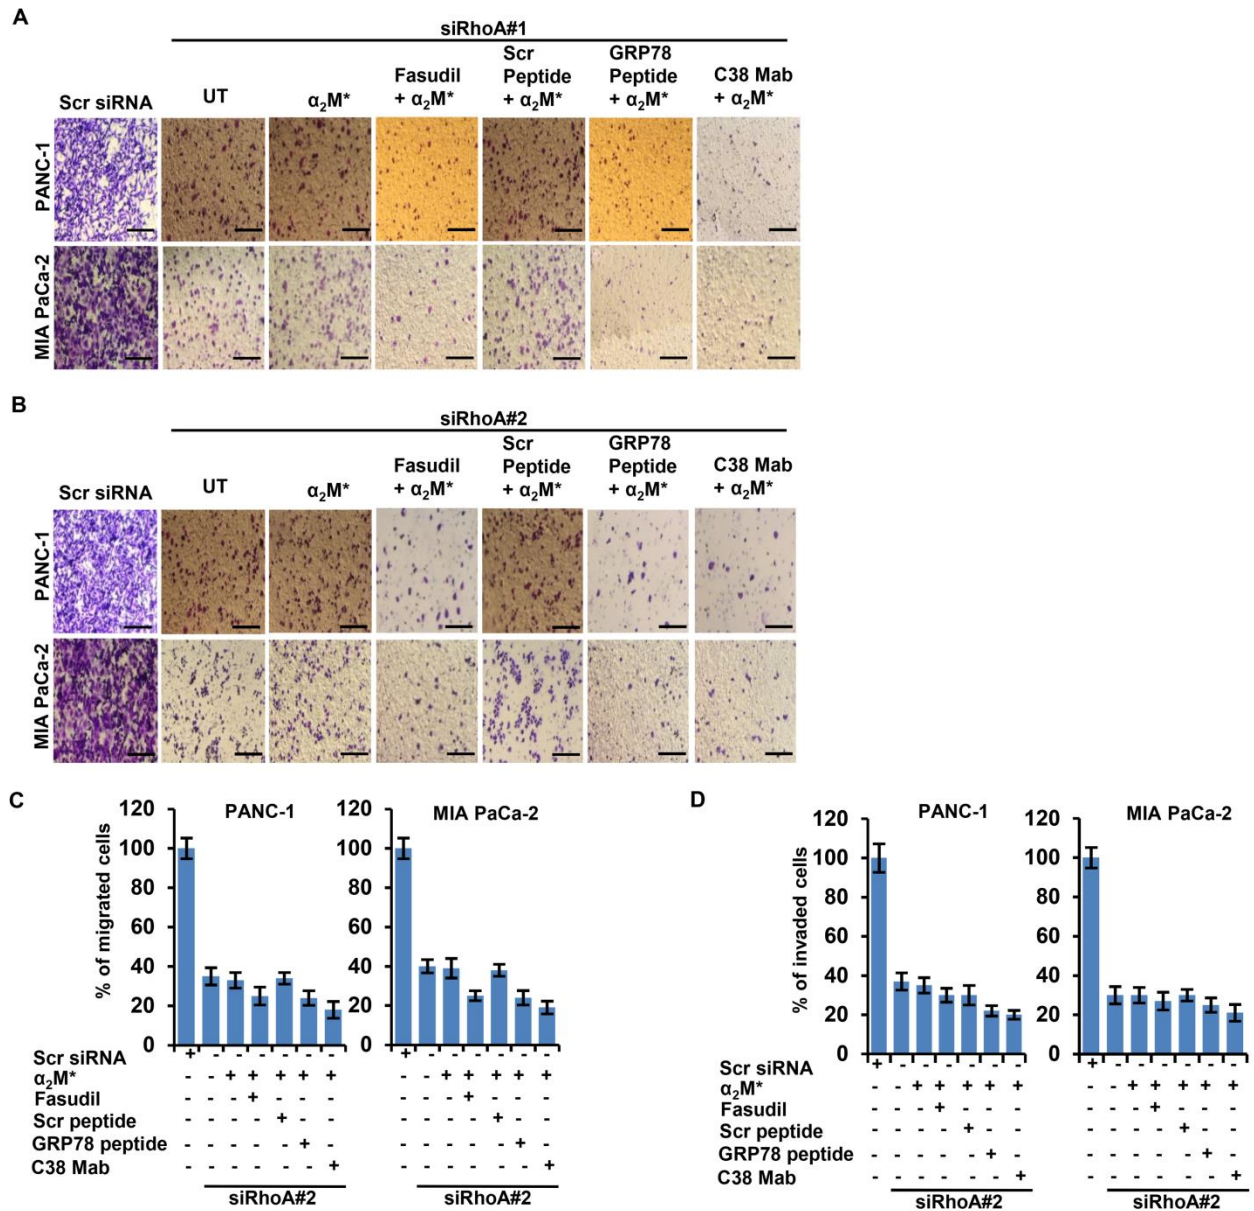



Supplemental Fig 4

A

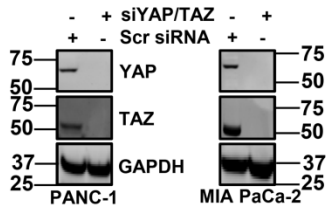

C

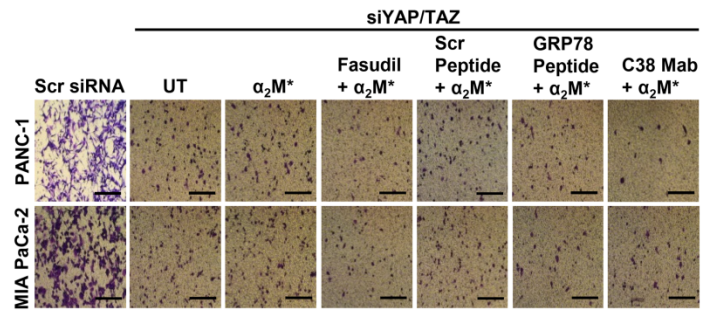

B

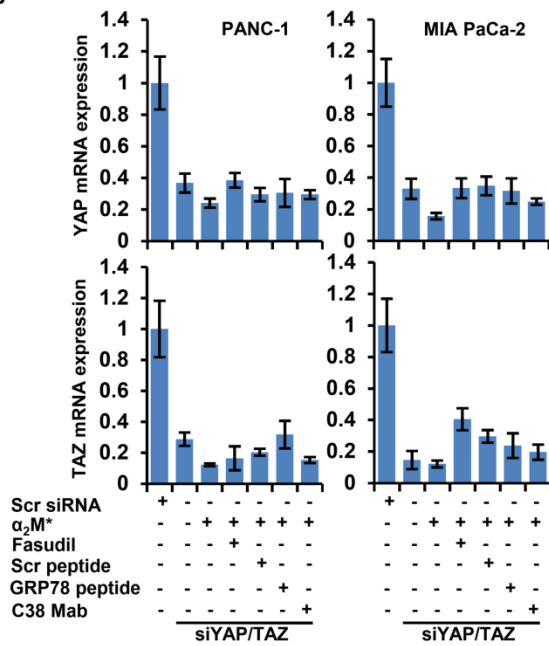

D

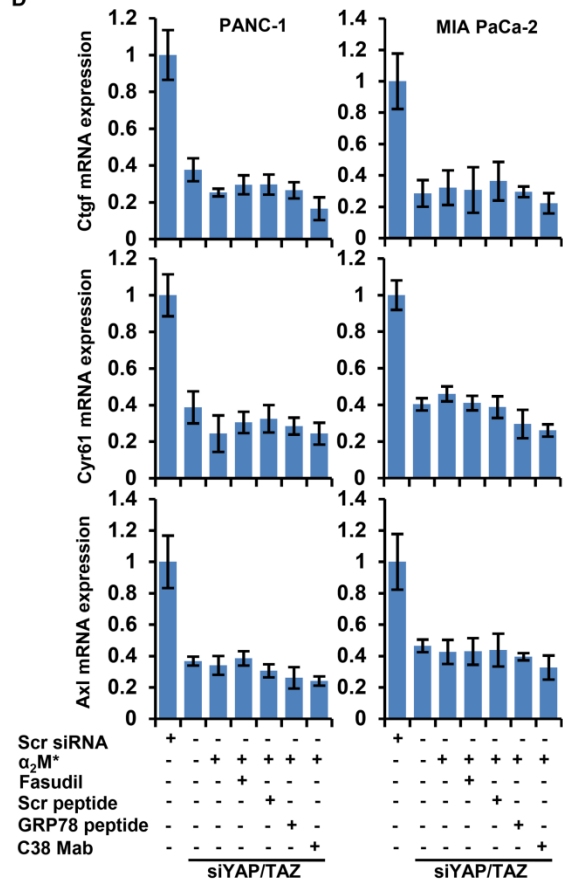

Supplemental Fig 5

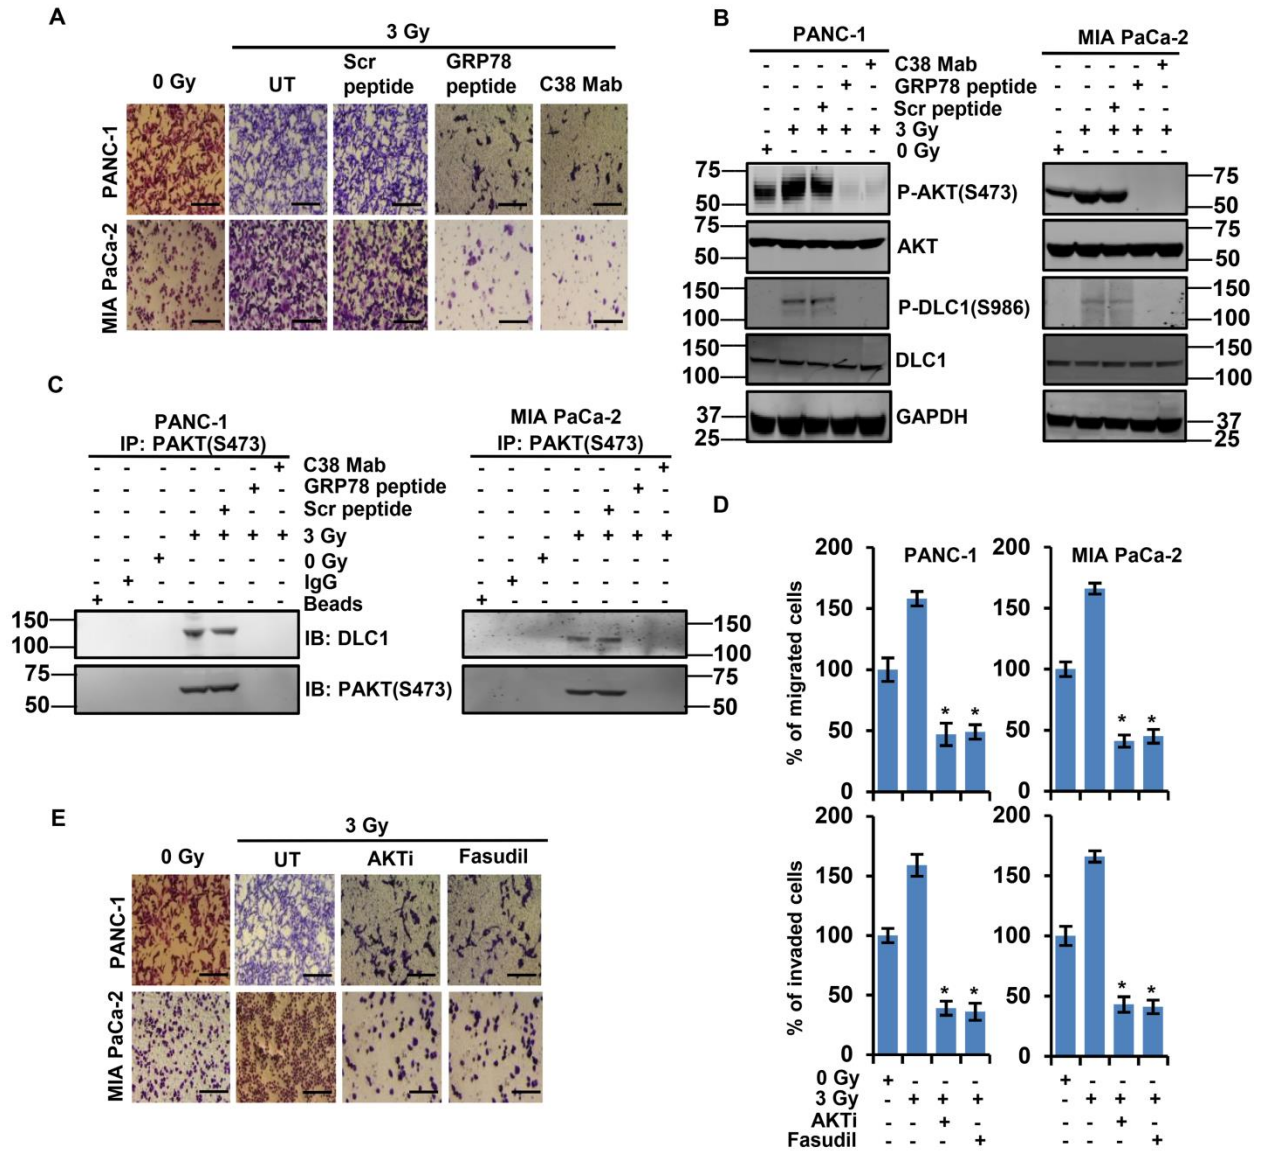

Supplement: supp_RA119.009091_145183_2_supp_370525_pvf1md.pdf [file supp_RA119.009091_145183_2_supp_370525_pvf1md.pdf]
